# Supplementary material
Source: PubMed Central journal article supplement (PMC7111312)
Supplement: mmc1.pdf [file mmc1.pdf]

## Supplemental information

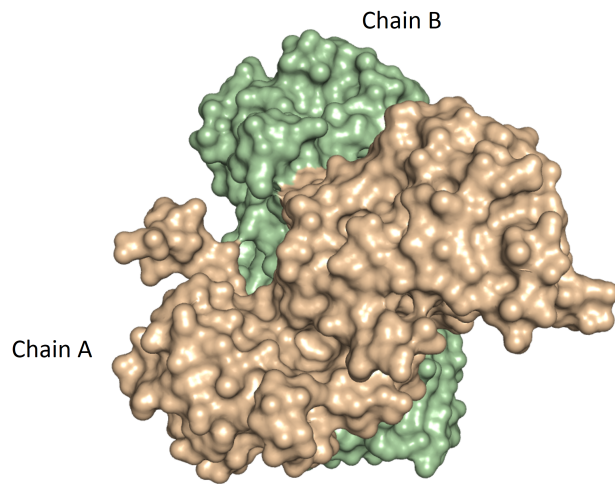

**Suppl. Fig. 1.** Surface representation of the SeMet-CavV 3CL<sup>pro</sup> dimer (PDB ID: 5LAC). Chains A and B are shown in wheat and green, respectively.

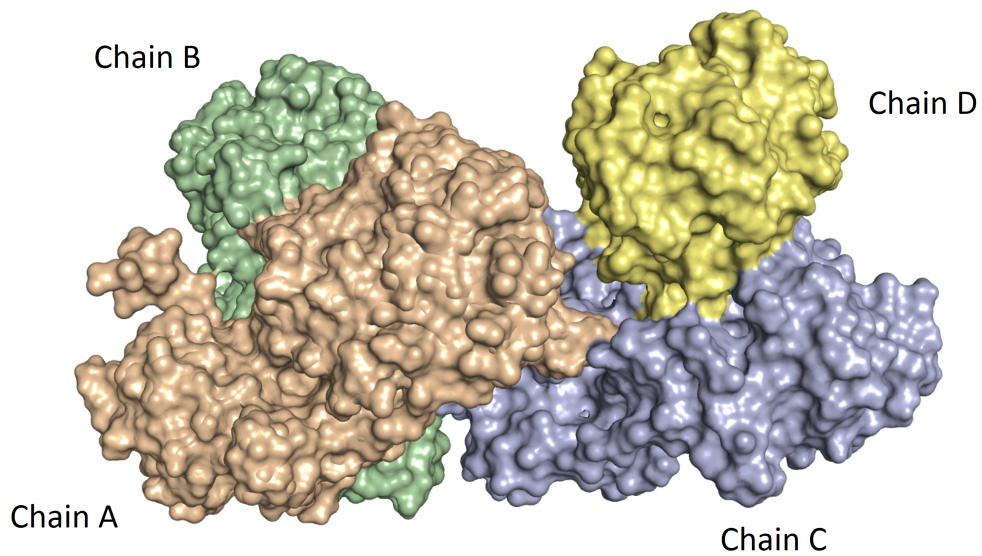

**Suppl. Fig. 2.** Surface representation of the structure of the CavV 3CL<sup>pro</sup>/inhibitor complex (PDB ID: 5LAK), including chains A (wheat), B (green), C (blue), and D (yellow).

**Suppl. Table 1.** Nidovirus genomes used for phylogeny reconstruction.

| <b>Species</b>                                               | <b>Acronym</b> | <b>Accession number</b> |
|--------------------------------------------------------------|----------------|-------------------------|
| <i>Alphaarterivirus equid</i>                                | EAV            | X53459.3                |
| <i>Gammaarterivirus lacdeh</i>                               | LDV            | U15146.1                |
| <i>Betaarterivirus suid 1</i>                                | PRRSV-1        | M96262.2                |
| <i>Betaarterivirus suid 2</i>                                | PRRSV-2        | U87392.3                |
| <i>Betaarterivirus chinrav 1</i>                             | RatAV          | KP280006.1              |
| <i>Deltaarterivirus hemfev</i>                               | SHFV           | AF180391.2              |
| <i>Iotaarterivirus kibreg 1</i>                              | KRTGV          | JX473849.1              |
| <i>Zetaarterivirus ugarco 1</i>                              | KRCV-1         | KC787630.1              |
| <i>Etaarterivirus ugarco 1</i>                               | KRCV-2         | KC787658.1              |
| <i>Thetaarterivirus mikelba 1</i>                            | MYBV-1         | KM110938.1              |
| <i>Epsilonarterivirus hemcep</i>                             | SHEV           | KM677927.1              |
| <i>Iotaarterivirus debrazmo</i>                              | DeMAV          | KP126831.1              |
| <i>Deltaarterivirus pejah</i>                                | PBJV           | KR139839.1              |
| <i>Thetaarterivirus kafuba</i>                               | KKCBV          | KT447550.1              |
| <i>Epsilonarterivirus safriver</i>                           | FSVV           | KR862307.1              |
| <i>Lambdaarterivirus afriporav</i>                           | APRAV          | KP026921.1              |
| <i>Kappaarterivirus wobum</i>                                | WPDV           | JN116253.3              |
| <i>Alphacoronavirus 1</i>                                    | TGEV           | AJ271965.2              |
| <i>Human coronavirus 229E</i>                                | HCoV_229E      | AF304460.1              |
| <i>Human coronavirus NL63</i>                                | HCoV_NL63      | AY567487.2              |
| <i>Miniopterus bat coronavirus 1</i>                         | Mi-BatCoV_1A   | EU420138.1              |
| <i>Miniopterus bat coronavirus HKU8</i>                      | Mi-BatCoV_HKU8 | EU420139.1              |
| <i>Porcine epidemic diarrhea virus</i>                       | PEDV           | AF353511.1              |
| <i>Rhinolophus bat coronavirus HKU2</i>                      | Rh-BatCoV_HKU2 | EF203065.1              |
| <i>Scotophilus bat coronavirus 512</i>                       | Sc-BatCoV_512  | DQ648858.1              |
| <i>Bat coronavirus HKU10</i>                                 | BtCoV_HKU10    | JQ989271.1              |
| <i>Bat coronavirus CDPHE15</i>                               | BtCoV_CDPHE15  | KF430219.1              |
| <i>Mink coronavirus 1</i>                                    | MCoV           | HM245925.1              |
| <i>Betacoronavirus 1</i>                                     | HCoV_OC43      | AY585228.1              |
| <i>Human coronavirus HKU1</i>                                | HCoV_HKU1      | AY597011.2              |
| <i>Murine coronavirus</i>                                    | MHV            | AY700211.1              |
| <i>Pipistrellus bat coronavirus HKU5</i>                     | Pi-BatCoV_HKU5 | EF065509.1              |
| <i>Rousettus bat coronavirus HKU9</i>                        | Ro-BatCoV_HKU9 | EF065513.1              |
| <i>Severe acute respiratory syndrome-related coronavirus</i> | SARS-CoV       | AY274119.3              |
| <i>Tylonycteris bat coronavirus HKU4</i>                     | Ty-BatCoV_HKU4 | EF065505.1              |
| <i>Middle East respiratory syndrome-related coronavirus</i>  | MERS-CoV       | JX869059.2              |
| <i>Hedgehog coronavirus 1</i>                                | EriCoV         | KC545383.1              |
| <i>Avian coronavirus</i>                                     | IBV            | M95169.1                |
| <i>Beluga whale coronavirus SW1</i>                          | BWCoV          | EU111742.1              |
| <i>Bulbul coronavirus HKU11</i>                              | BuCoV_HKU11    | FJ376619.2              |
| <i>Bulbul coronavirus HKU11</i>                              | ThCoV_HKU12    | FJ376621.1              |
| <i>Munia coronavirus HKU13</i>                               | MuCoV_HKU13    | FJ376622.1              |

| <b>Species</b>                          | <b>Acronym</b> | <b>Accession number</b> |
|-----------------------------------------|----------------|-------------------------|
| <i>Coronavirus HKU15</i>                | PoCoV_HKU15    | JQ065043.2              |
| <i>White-eye coronavirus HKU16</i>      | WECoV_HKU16    | JQ065044.1              |
| <i>Night heron coronavirus HKU19</i>    | NHCoV_HKU19    | JQ065047.1              |
| <i>Wigeon coronavirus HKU20</i>         | WiCoV_HKU20    | JQ065048.1              |
| <i>Common moorhen coronavirus HKU21</i> | CMCoV_HKU21    | JQ065049.1              |
| <i>Bovine torovirus</i>                 | BRV            | AY427798.1              |
| <i>Porcine torovirus</i>                | PToV           | JQ860350.1              |
| <i>White bream virus</i>                | WBV            | DQ898157.1              |
| <i>Fathead minnow nidovirus 1</i>       | FHMNV          | GU002364.2              |
| <i>Chinook salmon nidovirus 1</i>       | CSV            | KJ681496.1              |
| <i>Ball python nidovirus 1</i>          | BPNV           | KJ541759.1              |
| <i>Bovine nidovirus 1</i>               | BoNV           | KM589359.1              |
| <i>Alphamesonivirus 1</i>               | CavV           | HM746600.1              |
| <i>Alphamesonivirus 2</i>               | KSaV           | KC807171.1              |
| <i>Alphamesonivirus 3</i>               | DKNV           | AB753015.2              |
| <i>Alphamesonivirus 4</i>               | CASV           | KJ125489.1              |
| <i>Alphamesonivirus 5</i>               | HanaV          | JQ957872.1              |
| <i>Alphamesonivirus 8</i>               | NseV           | JQ957874.1              |
| <i>Alphamesonivirus 9</i>               | MenoV          | JQ957873.1              |
| <i>Gill-associated virus</i>            | GAV            | AF227196.1              |
| <i>Infratovirus 1</i>                   | INTOV          | KX883638.1              |
| <i>Sectovirus 1</i>                     | SECTOV         | KX883637.1              |
| <i>Turrinivirus 1</i>                   | TurrNV         | KX883629.1              |
| <i>Charybnavirus 1</i>                  | CharNV         | KX883628.1              |
| <i>Decronivirus 1</i>                   | DecNV          | KX883636.1              |
| <i>Paguronivirus 1</i>                  | PagRV          | KX883627.1              |

**Suppl. Table 2.** 3CL<sup>pro</sup> PDB entries used to produce the structure-based MSA.

| <b>PDB ID</b> | <b>Chain</b> | <b>Acronym</b> |
|---------------|--------------|----------------|
| 5LAC          | B            | CavV           |
| 2Q6D          | A            | IBV            |
| 4YO9          | A            | Ty-BatCoV_HKU4 |
| 4RSP          | A            | MERS-CoV       |
| 1UJ1          | A            | SARS-CoV       |
| 1P9S          | A            | HCoV_229E      |
| 3TLO          | A            | HCoV_NL63      |
| 5HYO          | A            | PEDV           |
| 1LVO          | A            | TGEV           |
